# Supplementary material
Source: Springer Nature journal article supplement (https://www.springermedizin.de/resource/supplementary/12889_2014_7478_MOESM3_ESM.pdf/9497528)
Supplement: MOESM3 [file 9497528]

## Addressing organisational factors

Support to develop and monitor achievable and relevant goals and objectives (R, OL, F)

Promote and support evaluation efforts (OL)

Support to publish and disseminate evaluation findings (R, E)

Identify features of organisations which use evaluation for program development (R)

## Increasing evaluation capacity

Access to case studies which use both traditional and creative evaluation approaches (R)

Workforce development - training, skills building, mentoring (OL, E, R)

Evaluability assessment of programs (HP)

## Facilitating knowledge translation

Flexible evaluation designs (F, P)

Participatory action research methods (R, HP, F)

Funding contracts which include an evaluation budget (F, P)

All programs subject to monitoring and evaluation (P)
